# Supplementary material for: Comparative study of the photocatalytic performance for the degradation of different dyes by ZnIn2S4: adsorption, active species, and pathways
Source: Royal Society of Chemistry journal article supplement (doi:10.1039/c7ra00199a), 2017-01-01

## Supporting Information

# Comparative study of the photocatalytic performance for the degradation of different dyes by ZnIn<sub>2</sub>S<sub>4</sub>: Adsorption, active species, and pathways

*Tingting Liu, Lei Wang\*, Xue Lu, Jiamin Fan, XinxinCai, Bo Gao, Rui Miao, Jiaxuan Wang, Yongtao Lv*

Key Laboratory of Membrane Separation of Shaanxi Province, Xi'an University of Architecture and Technology, Yan Ta Road.No.13, Xi'an 710055, China.

**\* Corresponding author.**

Lei Wang

Key Laboratory of Membrane Separation of Shaanxi Province, Xi'an University of Architecture and Technology, Yan Ta Road.No.13, Xi'an 710055, China.

E-mail address: wl0178@126.com

Tel.: +86 029 8220 2729;

Fax: +86 029 8220 2729;

**Table A.1** Parameters of standard spectra and simulated spectra obtained by EPR.

|                   | BMPO/ $\cdot$ OH(Conf1) |           | BMPO/ $\cdot$ OH(Conf2) |           | BMPO/ $\cdot$ O <sub>2</sub> $\cdot$ (Conf1) |           | BMPO/ $\cdot$ O <sub>2</sub> $\cdot$ (Conf2) |           |
|-------------------|-------------------------|-----------|-------------------------|-----------|----------------------------------------------|-----------|----------------------------------------------|-----------|
|                   | Standard                | Simulated | Standard                | Simulated | Standard                                     | Simulated | Standard                                     | Simulated |
|                   | 13.47                   | 14.19     | 13.56                   | 13.97     | 13.40                                        | 13.49     | 13.37                                        | 13.21     |
| $\alpha_H^\beta$  | 15.31                   | 16.35     | 12.30                   | 12.99     | 12.10                                        | 9.97      | 9.42                                         | 9.86      |
| $\alpha_H^\gamma$ | 0.62                    | 0.58      | 0.66                    | 1.03      |                                              |           |                                              |           |

**Fig. A.1** Nitrogen adsorption-desorption isotherms of ZnIn<sub>2</sub>S<sub>4</sub> and the pore size distribution plot of ZnIn<sub>2</sub>S<sub>4</sub> (inset).

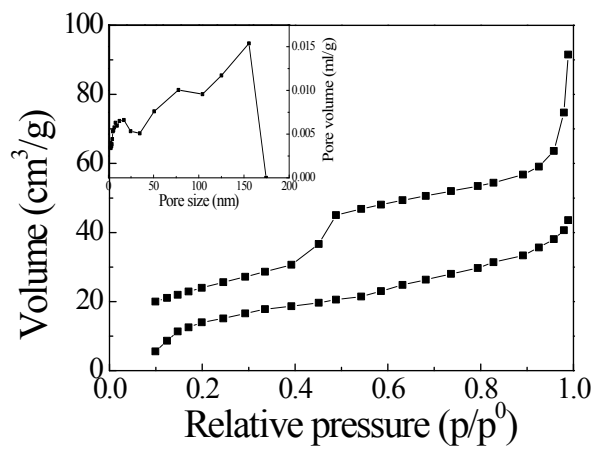

**Fig. A.2** Photocatalytic degradation of MO by  $\text{ZnIn}_2\text{S}_4$  under visible light irradiation in the presence of scavengers (EDTA, benzoquinone, and isopropyl alcohol were used to capture holes,  $\cdot\text{O}_2^-$ , and  $\cdot\text{OH}$ , respectively).

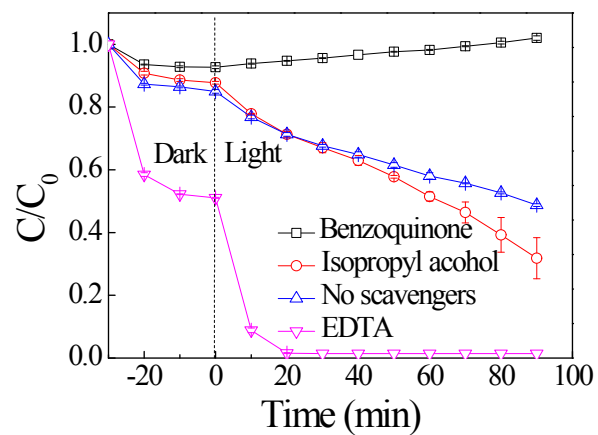

**Fig. A.3** UV-Vis diffuse reflectance spectra of ZnIn<sub>2</sub>S<sub>4</sub>.

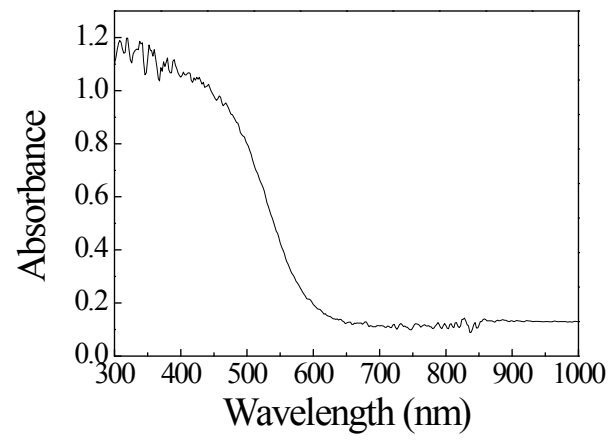

**Fig. A.4** XPS spectra of  $\text{ZnIn}_2\text{S}_4$ .

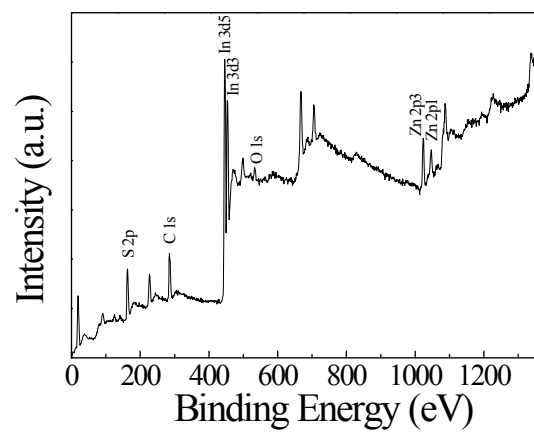

**Fig. A.5** HPLC chromatograms of RhB degraded samples under visible irradiation at (a) 0 min and (b) 60 min.

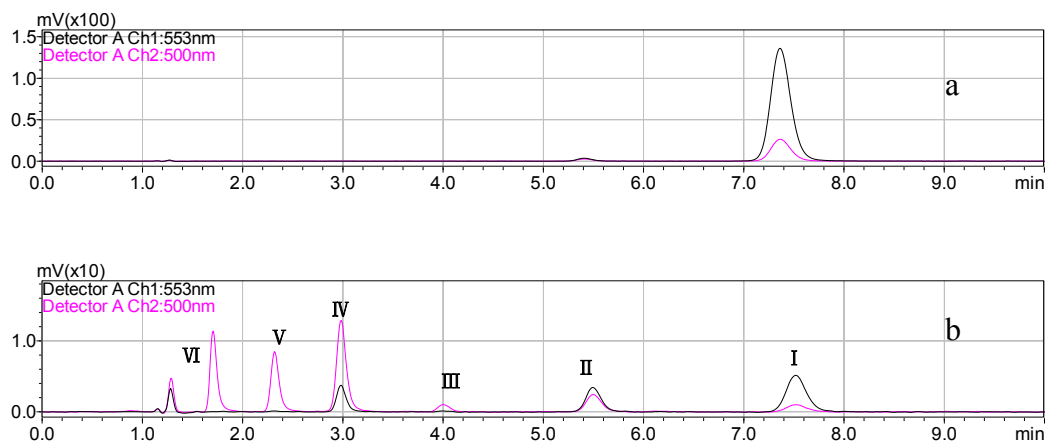

**Fig. A.6** UV-Vis spectra of degraded MO solution with an initial MO concentration of 5 mg/L and a ZnIn<sub>2</sub>S<sub>4</sub> dosage of 0.3 g/L.

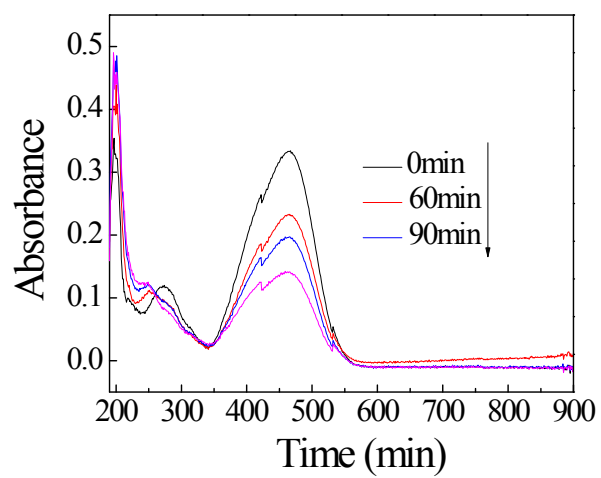



**Fig. A.7** Mass spectrograms of proposed intermediates generated during photocatalytic degradation of MO by ZnIn<sub>2</sub>S<sub>4</sub> under visible light irradiation.

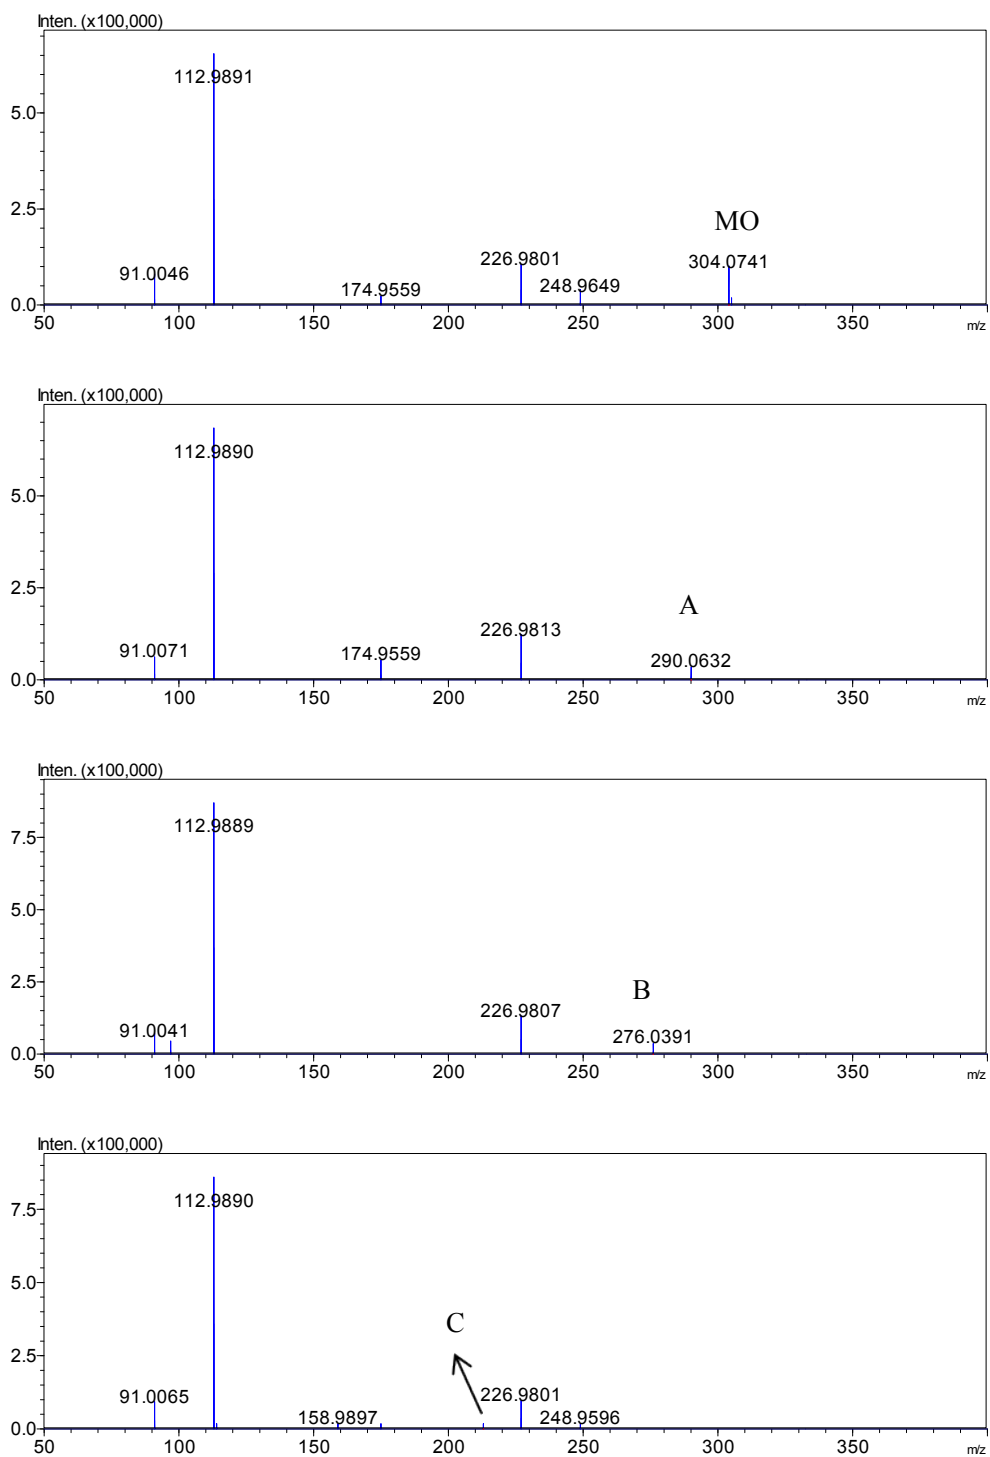

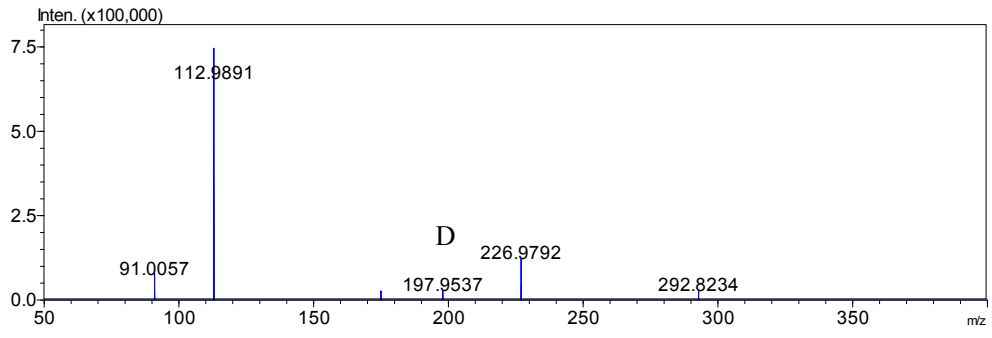

Supplement: c7ra00199a1.pdf [file c7ra00199a1.pdf]
